# Supplementary material
Source: PubMed Central journal article supplement (PMC4002106)
Supplement: supp_M114.550251_jbc.M114.550251-1.pdf [file supp_M114.550251_jbc.M114.550251-1.pdf]

**C**

***thisbe (ths)* promoter sequence conservation**

|                         | -40                     | +1      | +40               |
|-------------------------|-------------------------|---------|-------------------|
| <i>D. melanogaster</i>  | aacacaaaagccaaaaaatg    | tcgcacg | tttggttcggtttagtc |
| <i>D. simulans</i>      | aaacacaaaagccaaaaaatg   | tcgcacg | tttggttcggtttagtc |
| <i>D. sechellia</i>     | aacacaaaagccaaaaaatg    | tcgcacg | tttggttcggtttagtc |
| <i>D. yakuba</i>        | aacacaaaagccaaaaaatg    | tcgcacg | tttggttcggtttagtc |
| <i>D. erecta</i>        | aacacaaaagccaaaaaatg    | tcgcacg | tttggttcggtttagtc |
| <i>D. ananassae</i>     | aacacaaaagccaaaaaatg    | tcgcacg | tttggttcggtttagtc |
| <i>D. pseudoobscura</i> | aaacacaaaagccaaaaaatg   | tcgcacg | tttggttcggtttagtc |
| <i>D. persimilis</i>    | aaacacaaaagccaaaaaatg   | tcgcacg | tttggttcggtttagtc |
| <i>D. willistoni</i>    | cacaacacaaaagccaaaaaatg | tcgcacg | tttggttcggtttagtc |
| <i>D. virilis</i>       | acaacagcaacaagaaaatg    | tcgcacg | tttggttcggtttagtc |
| <i>D. mojavensis</i>    | acaacagcaacaagaaaatg    | tcgcacg | tttggttcggtttagtc |
| <i>D. grimshawi</i>     | acagcagcaacaagaaaatg    | tcgcacg | tttggttcggtttagtc |
|                         | :                       | .       | ..                |

**D**

***Multi drug resistance 49 (Mdr49)* promoter sequence conservation**

|                         | -40                       | +1      | +40          |
|-------------------------|---------------------------|---------|--------------|
| <i>D. melanogaster</i>  | accgagctgtcgtcgcaaccattc  | gatattt | gtgtagtc     |
| <i>D. simulans</i>      | accgagctgtcgtcgcaaccattc  | gatattt | gtgtagtc     |
| <i>D. sechellia</i>     | accgagctgtcgtcgcaaccattc  | gatattt | gtgtagtc     |
| <i>D. yakuba</i>        | accgagctgtcgtcgcaaccattc  | gatattt | gtgtagtc     |
| <i>D. erecta</i>        | accgagctgtcgtcgcaaccattc  | gatattt | gtgtagtc     |
| <i>D. ananassae</i>     | accgagttgtccttgtaactt     | gttgtag | caattggttgtc |
| <i>D. pseudoobscura</i> | aaccgagctgtcgtcgcaaccaatt | gactggg | actcgtc      |
| <i>D. persimilis</i>    | aaccgagctgtcgtcgcaaccaatt | gactggg | actcgtc      |
| <i>D. willistoni</i>    | accgagttggttgctgtaacc     | gctgatg | ggagacaccatc |
| <i>D. virilis</i>       | =====                     |         |              |
| <i>D. grimshawi</i>     | =====                     |         |              |
|                         | .                         | .       | ..           |

**E**

**phantom (phm) promoter sequence conservation**

|                         | -40                                      | +1                | +40                                   |
|-------------------------|------------------------------------------|-------------------|---------------------------------------|
| <i>D. melanogaster</i>  | ttctgtccgagagactcgtttcaaattctaaagaaattc  | cagt              | aatcgcagagctctgctggcgactggacgtcgggatg |
| <i>D. simulans</i>      | =====attctaaagaaattc                     | cagc              | tatatcgcagagctctgctggcgactgtctctccgat |
| <i>D. sechellia</i>     | ttttgtccgagagactcgtttcaaattctaaagaaattc  | cagt              | aatcgcagagctctgctggcgactggaccagtcggga |
| <i>D. yakuba</i>        | ttttgtccgagagactcgtttcaaattctaaagaaattc  | cagt              | aatcgcagagctctgctggcgactggacgtcgggatc |
| <i>D. erecta</i>        | ttctgtcccagagactcgtttcaaattctaaagaaattc  | cagt              | aatcgcagagctctgctggcgactggacgtcgggatc |
| <i>D. ananassae</i>     | gttgggcaccgagacccgtttcaaattctaaagaaattc  | cagt              | aatcgcagagcgtctcgggtgaccagacgtcctcaa  |
| <i>D. pseudoobscura</i> | atcttctggccgagactcgtttcaaattctaaagaaattc | cagt              | aatgatgagcattgctggcgactggacgtctcgtgg  |
| <i>D. persimilis</i>    | catttctggcgagactcgtttcaaattctaaagaaattc  | cagt              | aatgatgagcattgctggcgactggacgtctcgtgg  |
| <i>D. willistoni</i>    | =====tcaaattctaaaaaggaaattc              | cagt              | agtaagtgaagagcattgcagccgaacggacgtcgac |
| <i>D. virilis</i>       | attacgctcccagacagtttcgaaaatccatagaaattc  | cagt              | aattgaagaaccgcctggccgaacggacgtgtacca  |
| <i>D. mojavensis</i>    | tgcctgcattacatttcgcccgaaatccgtagaaattc   | cagt              | aattgaagagccgcacagtcgagcggacgtcagcgtc |
| <i>D. grimshawi</i>     | catttgcgtgccgacacgtttcgatttccatggaaatgc  | cagt              | aattgaagaacctcgctgccgaacagacgttgctgat |
|                         | . . . . .                                | : : : : . . . . . | . : . . . . .                         |

**F**

**rho like (RhoL) promoter sequence conservation**

|                         | -40                                      | +1        | +40                                  |
|-------------------------|------------------------------------------|-----------|--------------------------------------|
| <i>D. melanogaster</i>  | gaactctgagagctaaacgaatcggaatcgccaaaggt   | tcagtt    | gttcgacgacatcgcgatcgatcggttgtgctatt  |
| <i>D. simulans</i>      | tcgaactgagagtgaaacgaatccgaatcgccaaaggt   | tcagtt    | gttcgacgacatcgcgatcgatcggttgtggctatt |
| <i>D. sechellia</i>     | tcgaactgagagtgaaacgaatccgaatcgccaaaggt   | tcagtt    | gttcgacgacatcgcgatcgatcggttgtggctatt |
| <i>D. yakuba</i>        | ctgagagcgaacagaaacaactcgccgatggttcact    | tcagtt    | gttcgacgacatcgcgatcgatcggttgtggctatt |
| <i>D. erecta</i>        | cgaactgagagggcaacaatcgacgtgatgttcact     | tcagtt    | gttcgacgacatcgcgatcgatcggttgtggctatt |
| <i>D. ananassae</i>     | gttcgctcggcgctggttcagctggttgaggtggtg     | ttagtt    | gcctgacgacatcgccaacgatcggttcgtttaagc |
| <i>D. pseudoobscura</i> | gtggcgtcgtatccgctcagatacaaaaactgctgcctc  | tcagat    | gccttgcgactgcacgagtgatcggttgtggtggtg |
| <i>D. persimilis</i>    | gtggcgtcgtatccgctcagatacaaaaattgctgcctc  | tcagat    | gccttgcgactgcacgagtgatcggttgtggtggtg |
| <i>D. willistoni</i>    | =====                                    |           |                                      |
| <i>D. virilis</i>       | cttttggccactcaacgttatccgctcagataactcgttc | tcagtt    | gcgtgacgactgccggagcgcacggttgtgccagct |
| <i>D. mojavensis</i>    | =====                                    |           |                                      |
| <i>D. grimshawi</i>     | gatgttggtcacacgggctaaccgacagagactcgttc   | tcagtt    | gcgttatgactgcccgagcgcacggttgttccagct |
|                         | .                                        | . . . . . | . . . . .                            |
